# Supplementary material
Source: PubMed Central journal article supplement (PMC5528332)
Supplement: MOL2-6-276-s001.pdf [file MOL2-6-276-s001.pdf]

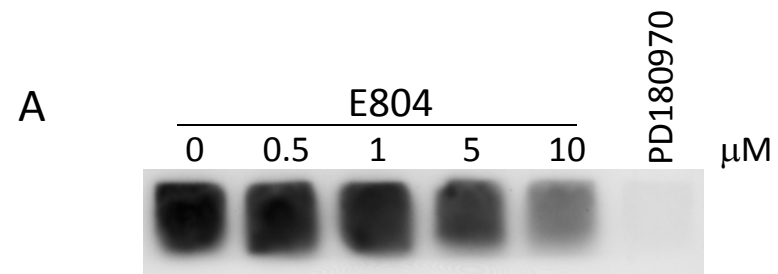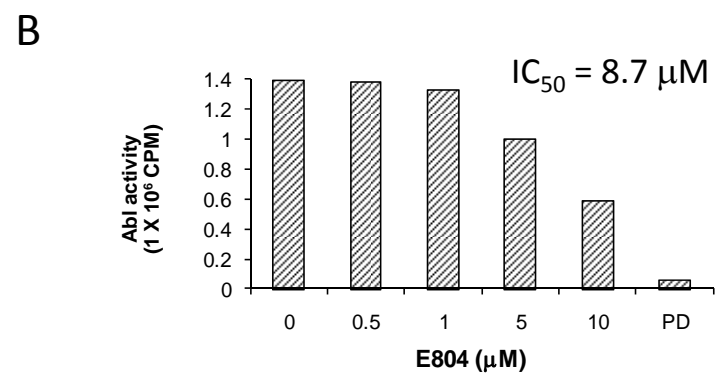

## Supplementary figure legends

Supplementary Figure 1 – A. For Abl kinase assay *in vitro*, 20 ng of recombinant Abl protein were preincubated with DMSO, E804, or PD180970 as an Abl kinase inhibitor (1  $\mu$ M) as positive control for 30 min. [ $\gamma$ - $^{32}$ P] ATP (5  $\mu$ Ci) was added per 25  $\mu$ L reaction mixture for 20 min. Twenty-microliter aliquots were transferred onto the center of substrate-binding phosphocellulose paper squares. Assay squares were transferred to vials with 5 mL of scintillation cocktail. After quantifying activity with a scintillation counter, radioactivity in assay squares was directly visualized by autoradiography. B. Abl kinase activities shown in A were quantified with ImageQuant software (Molecular Dynamics, Sunnydale, CA). The IC<sub>50</sub> value of Abl kinase inhibition by E804 was determined.
